# Supplementary material for: The current use and attitudes towards tumor genome sequencing in breast cancer
Source: PubMed Central journal article supplement (PMC4773754; doi:10.1038/srep22517), 2016-03-02
Supplement: srep22517-s1.pdf [file srep22517-s1.pdf]

## **The current use and attitudes towards tumor genome sequencing in breast cancer**

I. Gingras<sup>1</sup>, MD; A. Sonnenblick<sup>1,2</sup>, MD, PhD; E. de Azambuja<sup>1,3</sup>, MD, PhD; M. Paesmans<sup>4</sup>, M. Sc.; S. Delaloge<sup>5</sup>, MD; Philippe Aftimos<sup>3</sup>, MD; M. J. Piccart<sup>1,3</sup>, MD, PhD; C. Sotiriou<sup>2,3</sup>, MD, PhD; M. Ignatiadis<sup>2,3</sup>, MD, PhD; H. A. Azim Jr<sup>1,2</sup>, MD, PhD.

1. Department of Medicine, BrEAST Data Centre, Institut Jules Bordet/Université libre de Bruxelles, Brussels, Belgium;

2. Breast Cancer Translational Research Laboratory J. C. Heuson, Institut Jules Bordet/Université libre de Bruxelles, Brussels, Belgium

3. Medical Oncology Clinic, Institut Jules Bordet/Université libre de Bruxelles, Brussels, Belgium

4. Data Centre, Institut Jules Bordet/Université libre de Bruxelles, Brussels, Belgium

5. Department of Medical Oncology, Institut Gustave-Roussy, Villejuif, France

### **Corresponding author:**

Isabelle Gingras, MD

Institut Jules Bordet

BrEAST Data Centre

Boulevard de Waterloo, 121

1000 Brussels,Belgium

Tel: ++32.2/541.30.99

E-mail: [isabelle.gingras@bordet.be](mailto:isabelle.gingras@bordet.be)

**Supplementary Table S1: 28 questions included in the online survey**

| <b>Number</b> | <b>Question</b>                                                                                                                                                                                                                                                                               |
|---------------|-----------------------------------------------------------------------------------------------------------------------------------------------------------------------------------------------------------------------------------------------------------------------------------------------|
| 1             | Years of clinical practice as an oncologist?                                                                                                                                                                                                                                                  |
| 2             | Current country of clinical practice?                                                                                                                                                                                                                                                         |
| 3             | Is your current practice mostly based in?<br>[Academic versus non-academic institution]                                                                                                                                                                                                       |
| 4             | Proportion of time allocated to research?                                                                                                                                                                                                                                                     |
| 5             | Field of specialization?                                                                                                                                                                                                                                                                      |
| 6             | Average number of new breast cancer patients per month in your clinic?                                                                                                                                                                                                                        |
| 7             | Have you ever used cancer genome sequencing techniques (excluding genomic assays that are only assessing the risk of recurrence in ER-positive breast cancer patients like OncotypeDx, Mammaprint, Prosigna, etc...) for clinical decision-making in breast cancer patients in your practice? |
| 8             | In the past 6 months, how many times have you asked for such test?                                                                                                                                                                                                                            |
| 9             | In what percentage of your breast cancer patients has tumor genome sequencing been performed at least once?                                                                                                                                                                                   |
| 10            | In which context(s) do you typically request for tumor genome sequencing in breast cancer patients?<br>[(Neo)adjuvant, 1 <sup>st</sup> diagnosis of metastasis, 1 <sup>st</sup> progression of metastatic disease. Standard of care no longer considered, patient request, research setting]  |
| 11            | What is (are) your main reason(s) to request for tumor genome sequencing in breast cancer patients?                                                                                                                                                                                           |
| 12            | How often do you modify your treatment decision according to results?                                                                                                                                                                                                                         |
| 13            | How often do the results lead to the enrollment of the patient in a specific clinical trial?                                                                                                                                                                                                  |
| 14            | How often do you believe the test increase patient's satisfaction with health care?                                                                                                                                                                                                           |
| 15            | How often do you believe these tests result in general improvement of patient care?                                                                                                                                                                                                           |
| 16            | How confident are you in interpreting tumor sequencing results?                                                                                                                                                                                                                               |
| 17            | Do you believe that support to interpret tumor genome sequencing is sufficient and accessible?                                                                                                                                                                                                |
| 18            | Are tumor boards dedicated to molecular screening organized in your institute?                                                                                                                                                                                                                |
| 19            | Where do you seek support and information when you experience difficulty with interpreting tumor sequencing results?                                                                                                                                                                          |
| 20            | What is (are) the principal source(s) of funding for tumor genome sequencing in your region?                                                                                                                                                                                                  |
| 21            | What is (are) the main platform(s) to perform tumor genome sequencing in your institute?                                                                                                                                                                                                      |
| 22            | If you are using commercial platform(s), please specify which one                                                                                                                                                                                                                             |
| 23            | In your routine clinical practice, you consider that tumor genome sequencing is<br>[Accessibility]                                                                                                                                                                                            |
| 24            | What is (are) the principal obstacle (s) to the use of tumor genome testing for breast cancer patients in your routine clinical practice?                                                                                                                                                     |
| 25            | If tumor genome sequencing were more accessible, would you request it more often                                                                                                                                                                                                              |

|           |                                                                                                                                                                                 |
|-----------|---------------------------------------------------------------------------------------------------------------------------------------------------------------------------------|
|           | in your routine clinical practice?                                                                                                                                              |
| <b>26</b> | In your institute, is there local/regional guidelines concerning personalized medicine and the request for tumor genome sequencing in the management of breast cancer patients? |
| <b>27</b> | Do you believe that personalized medicine and tumor genome sequencing will play a central role in the management of breast cancer patients in the next 5-10 years?              |
| <b>28</b> | What are your principal concerns about the use of tumor genome sequencing in routine clinical practice?                                                                         |
